# Supplementary material
Source: HighWire-hosted journal article supplement (https://bmjopen.bmj.com/content/15/4/e092949)
Supplement: inline-supplementary-material-1 [file inline-supplementary-material-1.pdf]

Supplementary tables

Supplementary table 1: Characteristics associated with having vs having not heard about or witnessed V&A towards EMS staff.

|                      | Multivariable logistic regressions OR, [95% C.I. of OR], (P-value) |                                      |
|----------------------|--------------------------------------------------------------------|--------------------------------------|
|                      | 1a) Heard about V&A<br>(n = 877)                                   | 1b) Witnessed V&A<br>(n = 940)       |
| Female               | 1.119<br>[0.830, 1.509]<br>(p=0.462)                               | 1.067<br>[0.778, 1.463]<br>(p=0.688) |
| Age (years)          | 0.992<br>[0.983, 1.001]<br>(p=0.091)                               | 0.973<br>[0.964, 0.983]<br>(p<0.001) |
| Social grade C2/D/E  | 0.866<br>[0.641, 1.170]<br>(p=0.349)                               | 1.042<br>[0.759, 1.430]<br>(p=0.800) |
| Mid and West Wales   | 1.002<br>[0.588, 1.708]<br>(p=0.994)                               | 1.259<br>[0.692, 2.291]<br>(p=0.451) |
| North Wales          | 1.196<br>[0.706, 2.027]<br>(p=0.506)                               | 1.550<br>[0.880, 2.730]<br>(p=0.129) |
| South Wales Central  | 0.985<br>[0.487, 1.993]<br>(p=0.967)                               | 1.031<br>[0.461, 2.304]<br>(p=0.941) |
| South Wales East     | 1.404<br>[0.832, 2.370]<br>(p=0.204)                               | 1.479<br>[0.854, 2.563]<br>(p=0.162) |
| South Wales West     | 0.698<br>[0.407, 1.198]<br>(p=0.192)                               | 1.667<br>[0.931, 2.985]<br>(p=0.086) |
| ALL WORKERS<br>(NET) | 1.071<br>[0.770, 1.490]<br>(p=0.684)                               | 0.861<br>[0.615, 1.206]<br>(p=0.385) |

Responses grouped from Table 2a, No: Never; Yes: Less than 10 times, Between 10 and 20 times, More than 20 times. Reference categories: female with respect to male; social grade C2/D/E with respect to A/B/C1; Welsh regions with respect to Cardiff; all workers (NET) with respect to non-workers.

Supplementary table 2a: Situations where respondents had heard about V&A towards EMS staff.

| Q2 Responses (n = 631)                                                | n (%)       |
|-----------------------------------------------------------------------|-------------|
| Via work                                                              | 112 (17.7%) |
| Via a social setting (e.g. pub, sports team, etc.)                    | 118 (18.7%) |
| Through the media (e.g. TV reports, a campaign on social media, etc.) | 512 (81.1%) |
| Through discussions with friends/ acquaintances/ family members       | 293 (46.4%) |
| Other                                                                 | 20 (3.2%)   |
| Don't know/can't recall                                               | 8 (1.3%)    |

Multiple choice question – n and percentages may not add up to the total or 100%.

Supplementary table 2b: Characteristics associated with having heard about V&A towards EMS staff via a situation.

|                     | Multivariable logistic regressions OR, [95% C.I. of OR], (P-value) |                                                        |                                                                     |                                                                   |
|---------------------|--------------------------------------------------------------------|--------------------------------------------------------|---------------------------------------------------------------------|-------------------------------------------------------------------|
|                     | Work (n = 623)                                                     | Social setting (e.g. pub, sports team, etc.) (n = 623) | Media (e.g. TV reports, a campaign on social media, etc.) (n = 623) | Discussions with friends/ acquaintances/ family members (n = 623) |
| Female              | 1.648<br>[1.065, 2.548]<br>(p=0.025)                               | 0.956<br>[0.632, 1.446]<br>(p=0.831)                   | 0.667<br>[0.435, 1.023]<br>(p=0.064)                                | 1.754<br>[1.266, 2.428]<br>(p=0.001)                              |
| Age (years)         | 0.982<br>[0.968, 0.996]<br>(p=0.010)                               | 0.972<br>[0.960, 0.985]<br>(p<0.001)                   | 1.016<br>[1.002, 1.029]<br>(p=0.021)                                | 0.992<br>[0.982, 1.002]<br>(p=0.104)                              |
| Social grade C2/D/E | 0.837<br>[0.542, 1.294]<br>(p=0.424)                               | 1.180<br>[0.779, 1.789]<br>(p=0.435)                   | 1.111<br>[0.726, 1.701]<br>(p=0.626)                                | 1.018<br>[0.735, 1.411]<br>(p=0.915)                              |
| Mid and West Wales  | 1.245<br>[0.569, 2.724]<br>(p=0.584)                               | 1.160<br>[0.527, 2.556]<br>(p=0.712)                   | 0.661<br>[0.288, 1.515]<br>(p=0.328)                                | 1.136<br>[0.632, 2.042]<br>(p=0.671)                              |
| North Wales         | 1.057<br>[0.502, 2.226]<br>(p=0.884)                               | 1.569<br>[0.761, 3.234]<br>(p=0.222)                   | 0.449<br>[0.210, 0.962]<br>(p=0.039)                                | 0.897<br>[0.511, 1.574]<br>(p=0.704)                              |
| South Wales Central | 0.902<br>[0.290, 2.805]<br>(p=0.858)                               | 0.822<br>[0.267, 2.534]<br>(p=0.733)                   | 0.437<br>[0.161, 1.190]<br>(p=0.105)                                | 1.043<br>[0.479, 2.272]<br>(p=0.915)                              |
| South Wales East    | 1.108<br>[0.544, 2.255]<br>(p=0.777)                               | 1.177<br>[0.576, 2.404]<br>(p=0.655)                   | 0.727<br>[0.337, 1.565]<br>(p=0.415)                                | 1.108<br>[0.643, 1.907]<br>(p=0.712)                              |
| South Wales West    | 1.543<br>[0.705, 3.378]<br>(p=0.278)                               | 1.811<br>[0.833, 3.937]<br>(p=0.134)                   | 0.728<br>[0.306, 1.731]<br>(p=0.472)                                | 2.138<br>[1.138, 4.014]<br>(p=0.018)                              |

|                   |                                      |                                      |                                      |                                      |
|-------------------|--------------------------------------|--------------------------------------|--------------------------------------|--------------------------------------|
| ALL WORKERS (NET) | 2.992<br>[1.841, 4.863]<br>(p<0.001) | 1.234<br>[0.796, 1.912]<br>(p=0.347) | 0.663<br>[0.421, 1.046]<br>(p=0.077) | 1.153<br>[0.811, 1.641]<br>(p=0.428) |
|-------------------|--------------------------------------|--------------------------------------|--------------------------------------|--------------------------------------|

*Reference categories: female with respect to male; social grade C2/D/E with respect to A/B/C1; Welsh regions with respect to Cardiff; all workers (NET) with respect to non-workers.*

Supplementary table 2c: Sensitivity analysis, including those from Q1a who reporting not having heard about V&A towards EMS staff as No from a setting. Characteristics associated with having heard about V&A towards EMS staff via a situation.

|                     | Multivariable logistic regressions OR, [95% C.I. of OR], (P-value) |                                                        |                                                                     |                                                                   |
|---------------------|--------------------------------------------------------------------|--------------------------------------------------------|---------------------------------------------------------------------|-------------------------------------------------------------------|
|                     | Work (n = 869)                                                     | Social setting (e.g. pub, sports team, etc.) (n = 869) | Media (e.g. TV reports, a campaign on social media, etc.) (n = 869) | Discussions with friends/ acquaintances/ family members (n = 869) |
| Female              | 1.613<br>[1.061, 2.453]<br>(p=0.025)                               | 0.983<br>[0.660, 1.465]<br>(p=0.934)                   | 0.921<br>[0.701, 1.211]<br>(p=0.556)                                | 1.626<br>[1.218, 2.171]<br>(p=0.001)                              |
| Age (years)         | 0.981<br>[0.968, 0.995]<br>(p=0.006)                               | 0.972<br>[0.960, 0.984]<br>(p<0.001)                   | 1.001<br>[0.992, 1.009]<br>(p=0.843)                                | 0.991<br>[0.982, 1.000]<br>(p=0.041)                              |
| Social grade C2/D/E | 0.843<br>[0.554, 1.282]<br>(p=0.424)                               | 1.120<br>[0.750, 1.674]<br>(p=0.579)                   | 0.938<br>[0.713, 1.236]<br>(p=0.651)                                | 0.963<br>[0.721, 1.286]<br>(p=0.796)                              |
| Mid and West Wales  | 1.177<br>[0.554, 2.504]<br>(p=0.671)                               | 1.148<br>[0.534, 2.466]<br>(p=0.724)                   | 0.847<br>[0.515, 1.390]<br>(p=0.511)                                | 1.076<br>[0.637, 1.818]<br>(p=0.784)                              |
| North Wales         | 1.093<br>[0.532, 2.242]<br>(p=0.809)                               | 1.573<br>[0.783, 3.161]<br>(p=0.203)                   | 0.814<br>[0.504, 1.315]<br>(p=0.400)                                | 0.967<br>[0.582, 1.607]<br>(p=0.897)                              |
| South Wales Central | 0.769<br>[0.257, 2.300]<br>(p=0.639)                               | 0.807<br>[0.271, 2.403]<br>(p=0.700)                   | 0.727<br>[0.380, 1.390]<br>(p=0.334)                                | 1.006<br>[0.503, 2.011]<br>(p=0.987)                              |
| South Wales East    | 1.151<br>[0.579, 2.287]<br>(p=0.688)                               | 1.276<br>[0.639, 2.550]<br>(p=0.490)                   | 1.114<br>[0.692, 1.791]<br>(p=0.657)                                | 1.220<br>[0.747, 1.990]<br>(p=0.427)                              |
| South Wales West    | 1.282<br>[0.609, 2.698]<br>(p=0.514)                               | 1.442<br>[0.687, 3.026]<br>(p=0.333)                   | 0.679<br>[0.408, 1.131]<br>(p=0.137)                                | 1.407<br>[0.828, 2.392]<br>(p=0.207)                              |
| ALL WORKERS (NET)   | 2.911<br>[1.814, 4.673]<br>(p<0.001)                               | 1.280<br>[0.839, 1.953]<br>(p=0.252)                   | 0.892<br>[0.662, 1.203]<br>(p=0.455)                                | 1.169<br>[0.856, 1.595]<br>(p=0.325)                              |

*Reference categories: female with respect to male; social grade C2/D/E with respect to A/B/C1; Welsh regions with respect to Cardiff; all workers (NET) with respect to non-workers.*

Supplementary table 3a: How agreeable respondents were with the statement of “V&A towards EMS staff can be acceptable in some cases.”

| Q3 Responses (n = 1010)                    | Code    | n (%)       |
|--------------------------------------------|---------|-------------|
| Strongly disagree                          | 1       | 828 (82.0%) |
| Tend to disagree                           | 2       | 85 (8.4%)   |
| Neither agree nor disagree                 | 3       | 34 (3.4%)   |
| Tend to agree/ Strongly agree <sup>a</sup> | 4       | 41 (4.1%)   |
| Don't know                                 | Omitted | 22 (2.2%)   |

<sup>a</sup>The category has been grouped with another appropriate category due to a low number of responses, n<10. The column code represents the order of responses; 1 represents the reference category and each subsequent number represents each level in the model.

Supplementary table 3b: Characteristics associated with being more likely to agree with the statement “V&A towards EMS staff can be acceptable in some cases.”

| Q3 (n = 988)         | Multivariable ordinal logistic regressions<br>OR, [95% C.I. of OR], (P-value) |
|----------------------|-------------------------------------------------------------------------------|
| Female               | 1.189<br>[0.836, 1.690]<br>(p=0.335)                                          |
| Age (years)          | 0.966<br>[0.956, 0.977]<br>(p<0.001)                                          |
| Social grade C2/D/E  | 1.859<br>[1.301, 2.658]<br>(p=0.001)                                          |
| Mid and West Wales   | 1.115<br>[0.571, 2.177]<br>(p=0.750)                                          |
| North Wales          | 1.543<br>[0.833, 2.861]<br>(p=0.168)                                          |
| South Wales Central  | 1.372<br>[0.619, 3.038]<br>(p=0.436)                                          |
| South Wales East     | 0.963<br>[0.515, 1.800]<br>(p=0.905)                                          |
| South Wales West     | 1.675<br>[0.892, 3.143]<br>(p=0.108)                                          |
| ALL WORKERS<br>(NET) | 0.755<br>[0.525, 1.087]<br>(p=0.130)                                          |

The order of responses is represented in Supplementary Table 3a by the column code. Reference categories: female with respect to male; social grade C2/D/E with respect to

*A/B/C1; Welsh regions with respect to Cardiff; all workers (NET) with respect to non-workers.*

Supplementary table 4a: How many incidents of V&A towards EMS staff respondents are reported to the police each year in Wales.

| Q5 Responses (n = 1010)      | Code    | n (%)       |
|------------------------------|---------|-------------|
| None                         | 1       | 11 (1.1%)   |
| Less than 100                | 2       | 57 (5.6%)   |
| More than 100, less than 200 | 3       | 94 (9.3%)   |
| More than 200, less than 300 | 4       | 86 (8.5%)   |
| More than 300, less than 400 | 5       | 76 (7.5%)   |
| More than 400, less than 500 | 6       | 71 (7.0%)   |
| More than 500                | 7       | 335 (33.2%) |
| Don't know                   | Omitted | 280 (27.7%) |

*The column code represents the order of responses; 1 represents the reference category and each subsequent number represents each level in the model.*

Supplementary table 4b: Characteristics associated with thinking more incidents of V&A towards EMS staff are reported to the police each year in Wales.

| Q5 (n = 730)         | Multivariable ordinal logistic regressions<br>OR, [95% C.I. of OR], (P-value) |
|----------------------|-------------------------------------------------------------------------------|
| Female               | 0.729<br>[0.556, 0.956]<br>(p=0.022)                                          |
| Age (years)          | 1.007<br>[0.999, 1.015]<br>(p=0.082)                                          |
| Social grade C2/D/E  | 0.884<br>[0.674, 1.158]<br>(p=0.371)                                          |
| Mid and West Wales   | 1.206<br>[0.747, 1.947]<br>(p=0.444)                                          |
| North Wales          | 0.986<br>[0.626, 1.552]<br>(p=0.951)                                          |
| South Wales Central  | 1.558<br>[0.825, 2.942]<br>(p=0.172)                                          |
| South Wales East     | 0.922<br>[0.594, 1.432]<br>(p=0.718)                                          |
| South Wales West     | 1.493<br>[0.916, 2.433]<br>(p=0.108)                                          |
| ALL WORKERS<br>(NET) | 1.159<br>[0.869, 1.544]                                                       |

| (p=0.315)  
*The order of responses is represented in Supplementary Table 4a by the column code.  
Reference categories: female with respect to male; social grade C2/D/E with respect to  
A/B/C1; Welsh regions with respect to Cardiff; all workers (NET) with respect to non-  
workers.*



Supplementary table 5a: The percentage of EMS staff respondents thought have or will experience physical violence (e.g. spitting, punching, kicking, etc.) during their duties.

| Q6a Responses (n = 1010)          | Code    | n (%)       |
|-----------------------------------|---------|-------------|
| None <sup>a</sup> / Less than 10% | 1       | 56 (5.5%)   |
| More than 10%, less than 30%      | 2       | 180 (17.8%) |
| More than 30%, less than 60%      | 3       | 262 (25.9%) |
| More than 60%, less than 90%      | 4       | 224 (22.2%) |
| More than 90%                     | 5       | 136 (13.5%) |
| Don't know                        | Omitted | 152 (15.0%) |

<sup>a</sup>The category has been grouped with another appropriate category due to a low number of responses, n<10. The column code represents the order of responses; 1 represents the reference category and each subsequent number represents each level in the model.

Supplementary table 5b: Characteristics associated with thinking more EMS staff have or will experience physical violence (e.g. spitting, punching, kicking, etc.) during their duties.

| Q6a (n = 858)        | Multivariable ordinal logistic regressions<br>OR, [95% C.I. of OR], (P-value) |
|----------------------|-------------------------------------------------------------------------------|
| Female               | 1.143<br>[0.896, 1.457]<br>(p=0.281)                                          |
| Age (years)          | 1.001<br>[0.994, 1.009]<br>(p=0.727)                                          |
| Social grade C2/D/E  | 1.056<br>[0.828, 1.345]<br>(p=0.661)                                          |
| Mid and West Wales   | 1.068<br>[0.687, 1.661]<br>(p=0.769)                                          |
| North Wales          | 0.959<br>[0.632, 1.457]<br>(p=0.845)                                          |
| South Wales Central  | 0.831<br>[0.470, 1.470]<br>(p=0.525)                                          |
| South Wales East     | 1.206<br>[0.804, 1.809]<br>(p=0.365)                                          |
| South Wales West     | 1.041<br>[0.675, 1.606]<br>(p=0.855)                                          |
| ALL WORKERS<br>(NET) | 1.218<br>[0.935, 1.586]                                                       |

(p=0.144)

The order of responses is represented in Supplementary Table 5a by the column code. Reference categories: female with respect to male; social grade C2/D/E with respect to A/B/C1; Welsh regions with respect to Cardiff; all workers (NET) with respect to non-workers.

Supplementary table 5c: The percentage of EMS staff respondents thought have or will experience being threatened with a weapon during their duties.

| Q6b Responses (n = 1010)     | Code    | n (%)       |
|------------------------------|---------|-------------|
| None                         | 1       | 13 (1.3%)   |
| Less than 10%                | 2       | 215 (21.3%) |
| More than 10%, less than 30% | 3       | 251 (24.9%) |
| More than 30%, less than 60% | 4       | 219 (21.7%) |
| More than 60%, less than 90% | 5       | 101 (10.0%) |
| More than 90%                | 6       | 38 (3.8%)   |
| Don't know                   | Omitted | 173 (17.1%) |

The column code represents the order of responses; 1 represents the reference category and each subsequent number represents each level in the model.

Supplementary table 5d: Characteristics associated with thinking more EMS staff have or will experience being threatened with a weapon during their duties.

| Q6b (n = 837)       | Multivariable ordinal logistic regressions<br>OR, [95% C.I. of OR], (P-value) |
|---------------------|-------------------------------------------------------------------------------|
| Female              | 0.971<br>[0.759, 1.241]<br>(p=0.811)                                          |
| Age (years)         | 0.998<br>[0.990, 1.005]<br>(p=0.540)                                          |
| Social grade C2/D/E | 1.227<br>[0.960, 1.568]<br>(p=0.103)                                          |
| Mid and West Wales  | 0.841<br>[0.543, 1.305]<br>(p=0.441)                                          |
| North Wales         | 1.170<br>[0.768, 1.781]<br>(p=0.465)                                          |
| South Wales Central | 1.303<br>[0.735, 2.307]<br>(p=0.365)                                          |
| South Wales East    | 1.283<br>[0.852, 1.931]<br>(p=0.233)                                          |
| South Wales West    | 1.169                                                                         |

|                      |                                      |
|----------------------|--------------------------------------|
|                      | [0.755, 1.810]<br>(p=0.484)          |
| ALL WORKERS<br>(NET) | 1.236<br>[0.947, 1.613]<br>(p=0.119) |

*The order of responses is represented in Supplementary Table 5c by the column code.  
Reference categories: female with respect to male; social grade C2/D/E with respect to A/B/C1; Welsh regions with respect to Cardiff; all workers (NET) with respect to non-workers.*

Supplementary table 6a: How likely respondents thought EMS would experience verbal aggression from members of the public while at work.

| Q8a Responses (n = 1010)                         | Code    | n (%)       |
|--------------------------------------------------|---------|-------------|
| Not at all likely <sup>a</sup> / Not very likely | 1       | 51 (5.0%)   |
| Fairly likely                                    | 2       | 279 (27.6%) |
| Very likely                                      | 3       | 573 (56.7%) |
| Don't know                                       | Omitted | 107 (10.6%) |

<sup>a</sup>The category has been grouped with another appropriate category due to a low number of responses, n<10. The column code represents the order of responses; 1 represents the reference category and each subsequent number represents each level in the model.

Supplementary table 6b: Characteristics associated with being more likely to think EMS staff would experience verbal aggression from members of the public while at work.

| Q8a (n = 903)        | Multivariable ordinal logistic regressions<br>OR, [95% C.I. of OR], (P-value) |
|----------------------|-------------------------------------------------------------------------------|
| Female               | 1.268<br>[0.965, 1.666]<br>(p=0.088)                                          |
| Age (years)          | 1.009<br>[1.001, 1.018]<br>(p=0.035)                                          |
| Social grade C2/D/E  | 1.234<br>[0.938, 1.623]<br>(p=0.133)                                          |
| Mid and West Wales   | 1.186<br>[0.719, 1.958]<br>(p=0.504)                                          |
| North Wales          | 0.846<br>[0.529, 1.353]<br>(p=0.485)                                          |
| South Wales Central  | 0.420<br>[0.225, 0.782]<br>(p=0.006)                                          |
| South Wales East     | 0.968<br>[0.612, 1.532]<br>(p=0.890)                                          |
| South Wales West     | 0.927<br>[0.567, 1.514]<br>(p=0.762)                                          |
| ALL WORKERS<br>(NET) | 1.000<br>[0.744, 1.345]<br>(p=0.998)                                          |

The order of responses is represented in Supplementary Table 6a by the column code. Reference categories: female with respect to male; social grade C2/D/E with respect to

*A/B/C1; Welsh regions with respect to Cardiff; all workers (NET) with respect to non-workers.*

Supplementary table 6c: How likely respondents thought EMS would experience different forms of V&A from members of the public while at work.

| Responses         | Code    | n (%)                               |                                              |
|-------------------|---------|-------------------------------------|----------------------------------------------|
|                   |         | 8b) Physical violence<br>(n = 1010) | 8c) Sexual assault/<br>harassment (n = 1010) |
| Not at all likely | 1       | 13 (1.3%)                           | 35 (3.5%)                                    |
| Not very likely   | 2       | 149 (14.8%)                         | 219 (21.7%)                                  |
| Fairly likely     | 3       | 460 (45.5%)                         | 452 (44.8%)                                  |
| Very likely       | 4       | 267 (26.4%)                         | 141 (14.0%)                                  |
| Don't know        | Omitted | 121 (12.0%)                         | 163 (16.1%)                                  |

The column code represents the order of responses; 1 represents the reference category and each subsequent number represents each level in the model.

Supplementary table 6d: Characteristics associated with being more likely to think EMS staff would experience different form of V&A from members of the public while at work.

|                     | Multivariable ordinal logistic regressions OR, [95% C.I. of OR], (P-value) |                                            |
|---------------------|----------------------------------------------------------------------------|--------------------------------------------|
|                     | 8b) Physical violence<br>(n = 889)                                         | 8c) Sexual assault/harassment<br>(n = 847) |
| Female              | 1.405<br>[1.089, 1.813]<br>(p=0.009)                                       | 1.600<br>[1.231, 2.080]<br>(p<0.001)       |
| Age (years)         | 1.014<br>[1.006, 1.022]<br>(p<0.001)                                       | 1.002<br>[0.994, 1.010]<br>(p=0.679)       |
| Social grade C2/D/E | 1.157<br>[0.897, 1.492]<br>(p=0.263)                                       | 1.090<br>[0.840, 1.414]<br>(p=0.516)       |
| Mid and West Wales  | 0.976<br>[0.616, 1.545]<br>(p=0.917)                                       | 0.912<br>[0.569, 1.462]<br>(p=0.701)       |
| North Wales         | 1.095<br>[0.703, 1.705]<br>(p=0.688)                                       | 0.809<br>[0.515, 1.272]<br>(p=0.359)       |
| South Wales Central | 0.600<br>[0.331, 1.087]<br>(p=0.092)                                       | 0.871<br>[0.476, 1.594]<br>(p=0.654)       |
| South Wales East    | 1.237<br>[0.804, 1.902]<br>(p=0.334)                                       | 0.842<br>[0.542, 1.308]<br>(p=0.444)       |
| South Wales West    | 0.917<br>[0.576, 1.459]<br>(p=0.714)                                       | 1.001<br>[0.619, 1.617]<br>(p=0.998)       |
| ALL WORKERS         | 1.011                                                                      | 0.883                                      |

|       |                             |                             |
|-------|-----------------------------|-----------------------------|
| (NET) | [0.766, 1.332]<br>(p=0.940) | [0.665, 1.174]<br>(p=0.392) |
|-------|-----------------------------|-----------------------------|

*The order of responses is represented in Supplementary Table 6c by the column code.  
Reference categories: female with respect to male; social grade C2/D/E with respect to A/B/C1; Welsh regions with respect to Cardiff; all workers (NET) with respect to non-workers.*

Supplementary table 7a: How likely respondents thought the following members of the public would be V&A towards EMS staff.

| Responses         | Code    | n (%)                                                    |         |                                                                           |         |                                                                                 |         |
|-------------------|---------|----------------------------------------------------------|---------|---------------------------------------------------------------------------|---------|---------------------------------------------------------------------------------|---------|
|                   |         | Q9a) The patient being treated by the EMS staff (n=1010) |         | Q9b) A relative/friend of the patient being treated by EMS staff (n=1010) |         | Q9c) A bystander/stranger with no relation to the patient or EMS staff (n=1010) |         |
| Not at all likely | 1       | 32                                                       | (3.2%)  | 35                                                                        | (3.5%)  | 99                                                                              | (9.8%)  |
| Not very likely   | 2       | 200                                                      | (19.8%) | 202                                                                       | (20.0%) | 434                                                                             | (43.0%) |
| Fairly likely     | 3       | 455                                                      | (45.0%) | 489                                                                       | (48.4%) | 250                                                                             | (24.8%) |
| Very likely       | 4       | 193                                                      | (19.1%) | 135                                                                       | (13.4%) | 63                                                                              | (6.2%)  |
| Don't know        | Omitted | 130                                                      | (12.9%) | 149                                                                       | (14.8%) | 164                                                                             | (16.2%) |

The column code represents the order of responses; 1 represents the reference category and each subsequent number represents each level in the model.

Supplementary table 7b: Characteristics associated with being more likely to think EMS staff would experience different form of V&A from members of the public while at work.

|                     | Multivariable ordinal logistic regressions OR, [95% C.I. of OR], (P-value) |                                                             |                                                                   |
|---------------------|----------------------------------------------------------------------------|-------------------------------------------------------------|-------------------------------------------------------------------|
|                     | Q9a) Patient being treated (n = 880)                                       | Q9b) Relative/friend of the patient being treated (n = 861) | Q9c) Bystander/stranger with no relation to the patient (n = 846) |
| Female              | 1.204<br>[0.935, 1.551]<br>(p=0.150)                                       | 1.169<br>[0.899, 1.521]<br>(p=0.244)                        | 0.905<br>[0.699, 1.172]<br>(p=0.449)                              |
| Age (years)         | 0.998<br>[0.990, 1.005]<br>(p=0.532)                                       | 1.004<br>[0.995, 1.012]<br>(p=0.387)                        | 1.005<br>[0.997, 1.014]<br>(p=0.192)                              |
| Social grade C2/D/E | 1.241<br>[0.964, 1.598]<br>(p=0.094)                                       | 1.344<br>[1.033, 1.749]<br>(p=0.028)                        | 1.064<br>[0.822, 1.376]<br>(p=0.639)                              |
| Mid and West Wales  | 0.852<br>[0.543, 1.336]<br>(p=0.485)                                       | 1.169<br>[0.727, 1.880]<br>(p=0.520)                        | 1.029<br>[0.652, 1.624]<br>(p=0.902)                              |
| North Wales         | 1.187<br>[0.769, 1.833]<br>(p=0.439)                                       | 1.171<br>[0.745, 1.841]<br>(p=0.493)                        | 0.879<br>[0.563, 1.372]<br>(p=0.571)                              |
| South Wales Central | 0.918<br>[0.508, 1.659]<br>(p=0.778)                                       | 1.055<br>[0.571, 1.951]<br>(p=0.864)                        | 0.852<br>[0.468, 1.550]<br>(p=0.599)                              |
| South Wales East    | 1.103<br>[0.722, 1.685]<br>(p=0.649)                                       | 0.903<br>[0.581, 1.405]<br>(p=0.652)                        | 0.826<br>[0.534, 1.278]<br>(p=0.390)                              |
| South Wales West    | 1.019<br>[0.643, 1.616]                                                    | 1.178<br>[0.730, 1.901]                                     | 1.075<br>[0.674, 1.715]                                           |



|         | (p=0.936)      | (p=0.502)      | (p=0.762)      |
|---------|----------------|----------------|----------------|
| ALL     | 0.940          | 1.172          | 1.062          |
| WORKERS | [0.714, 1.237] | [0.880, 1.562] | [0.797, 1.414] |
| (NET)   | (p=0.660)      | (p=0.277)      | (p=0.683)      |

*The order of responses is represented in Supplementary Table 7a by the column code.  
Reference categories: female with respect to male; social grade C2/D/E with respect to A/B/C1; Welsh regions with respect to Cardiff; all workers (NET) with respect to non-workers.*

Supplementary table 8a: How many respondents were aware of the Assault on Emergency Workers (Offences) Act of 2018.

| Q11 Responses (n = 1010) | n (%)       |
|--------------------------|-------------|
| No                       | 788 (78.0%) |
| Yes                      | 222 (22.0%) |

Supplementary table 8b: Characteristics associated with being aware of the Assault on Emergency Workers (Offences) Act of 2018.

| Q11 (n = 1010)       | Multivariable logistic regressions OR,<br>[95% C.I. of OR], (P-value) |
|----------------------|-----------------------------------------------------------------------|
| Female               | 0.621<br>[0.459, 0.842]<br>(p=0.002)                                  |
| Age (years)          | 1.006<br>[0.997, 1.016]<br>(p=0.197)                                  |
| Social grade C2/D/E  | 0.872<br>[0.643, 1.183]<br>(p=0.379)                                  |
| Mid and West Wales   | 1.200<br>[0.700, 2.057]<br>(p=0.508)                                  |
| North Wales          | 0.923<br>[0.536, 1.587]<br>(p=0.771)                                  |
| South Wales Central  | 1.263<br>[0.630, 2.534]<br>(p=0.511)                                  |
| South Wales East     | 0.986<br>[0.583, 1.669]<br>(p=0.958)                                  |
| South Wales West     | 0.996<br>[0.569, 1.745]<br>(p=0.989)                                  |
| ALL WORKERS<br>(NET) | 1.147<br>[0.822, 1.601]<br>(p=0.420)                                  |

Reference categories: female with respect to male; social grade C2/D/E with respect to A/B/C1; Welsh regions with respect to Cardiff; all workers (NET) with respect to non-workers.

Supplementary table 9a: How agreeable respondents were with the statement “as a result of the Act, those who are V&A towards EMS staff will receive harsher sentences.”

| Q13 Responses (n = 1010)   | Code    | n (%)       |
|----------------------------|---------|-------------|
| Strongly disagree          | 1       | 23 (2.3%)   |
| Tend to disagree           | 2       | 53 (5.2%)   |
| Neither agree nor disagree | 3       | 150 (14.9%) |
| Tend to agree              | 4       | 295 (29.2%) |
| Strongly agree             | 5       | 377 (37.3%) |
| Don't know                 | Omitted | 112 (11.1%) |

*The column code represents the order of responses; 1 represents the reference category and each subsequent number represents each level in the model.*

Supplementary table 9b: Characteristics associated with being aware of the Assault on Emergency Workers (Offences) Act of 2018.

| Q13 (n = 898)        | Multivariable ordinal logistic regressions<br>OR, [95% C.I. of OR], (P-value) |
|----------------------|-------------------------------------------------------------------------------|
| Female               | 0.942<br>[0.737, 1.203]<br>(p=0.631)                                          |
| Age (years)          | 1.018<br>[1.010, 1.026]<br>(p<0.001)                                          |
| Social grade C2/D/E  | 0.969<br>[0.758, 1.238]<br>(p=0.801)                                          |
| Mid and West Wales   | 0.926<br>[0.605, 1.418]<br>(p=0.724)                                          |
| North Wales          | 1.081<br>[0.711, 1.642]<br>(p=0.716)                                          |
| South Wales Central  | 1.078<br>[0.614, 1.891]<br>(p=0.794)                                          |
| South Wales East     | 1.173<br>[0.784, 1.754]<br>(p=0.437)                                          |
| South Wales West     | 1.114<br>[0.720, 1.724]<br>(p=0.628)                                          |
| ALL WORKERS<br>(NET) | 0.914<br>[0.700, 1.192]<br>(p=0.507)                                          |

*The order of responses is represented in Supplementary Table 9a by the column code. Reference categories: female with respect to male; social grade C2/D/E with respect to A/B/C1; Welsh regions with respect to Cardiff; all workers (NET) with respect to non-workers.*

Supplementary table 10a: How many respondents were aware of any publicity/media campaigns in the last 2 years asking people to treat EMS staff with respect.

| Q14 Responses (n = 1010) | n (%)       |
|--------------------------|-------------|
| No                       | 538 (53.3%) |
| Yes                      | 472 (46.7%) |

Supplementary table 10b: Characteristics associated with being aware any publicity/media campaigns in the last 2 years asking people to treat EMS staff with respect.

| Q14 (n = 1010)      | Multivariable logistic regressions OR, [95% C.I. of OR], (P-value) |
|---------------------|--------------------------------------------------------------------|
| Female              | 1.321<br>[1.027, 1.699]<br>(p=0.030)                               |
| Age (years)         | 1.008<br>[1.000, 1.016]<br>(p=0.051)                               |
| Social grade C2/D/E | 0.843<br>[0.655, 1.085]<br>(p=0.184)                               |
| Mid and West Wales  | 0.840<br>[0.535, 1.320]<br>(p=0.450)                               |
| North Wales         | 0.759<br>[0.489, 1.180]<br>(p=0.221)                               |
| South Wales Central | 0.769<br>[0.426, 1.387]<br>(p=0.382)                               |
| South Wales East    | 0.994<br>[0.648, 1.525]<br>(p=0.978)                               |
| South Wales West    | 0.815<br>[0.516, 1.289]<br>(p=0.382)                               |
| ALL WORKERS (NET)   | 1.212<br>[0.921, 1.594]<br>(p=0.170)                               |

Reference categories: female with respect to male; social grade C2/D/E with respect to A/B/C1; Welsh regions with respect to Cardiff; all workers (NET) with respect to non-workers.
